# Supplementary material for: Alterations in bone marrow metabolism are an early and consistent feature during the development of MGUS and multiple myeloma
Source: PubMed Central journal article supplement (PMC4635194; doi:10.1038/bcj.2015.85), 2015-10-16
Supplement: bcj201585x1.pdf [file bcj201585x1.pdf]

**a**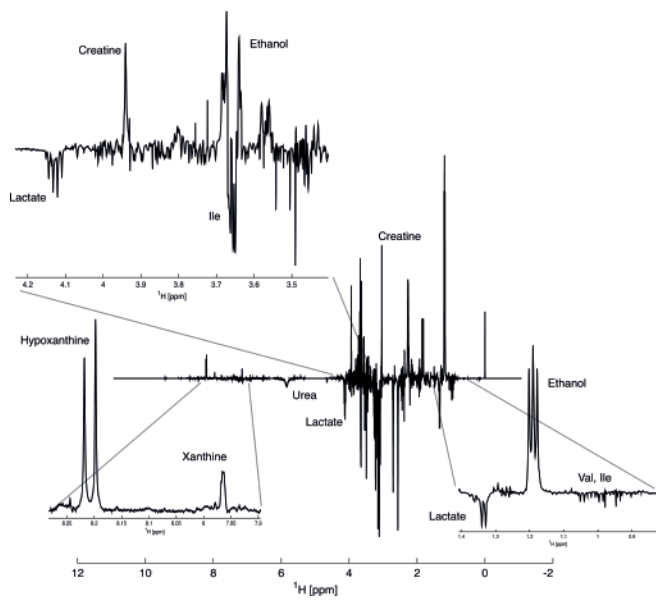**b**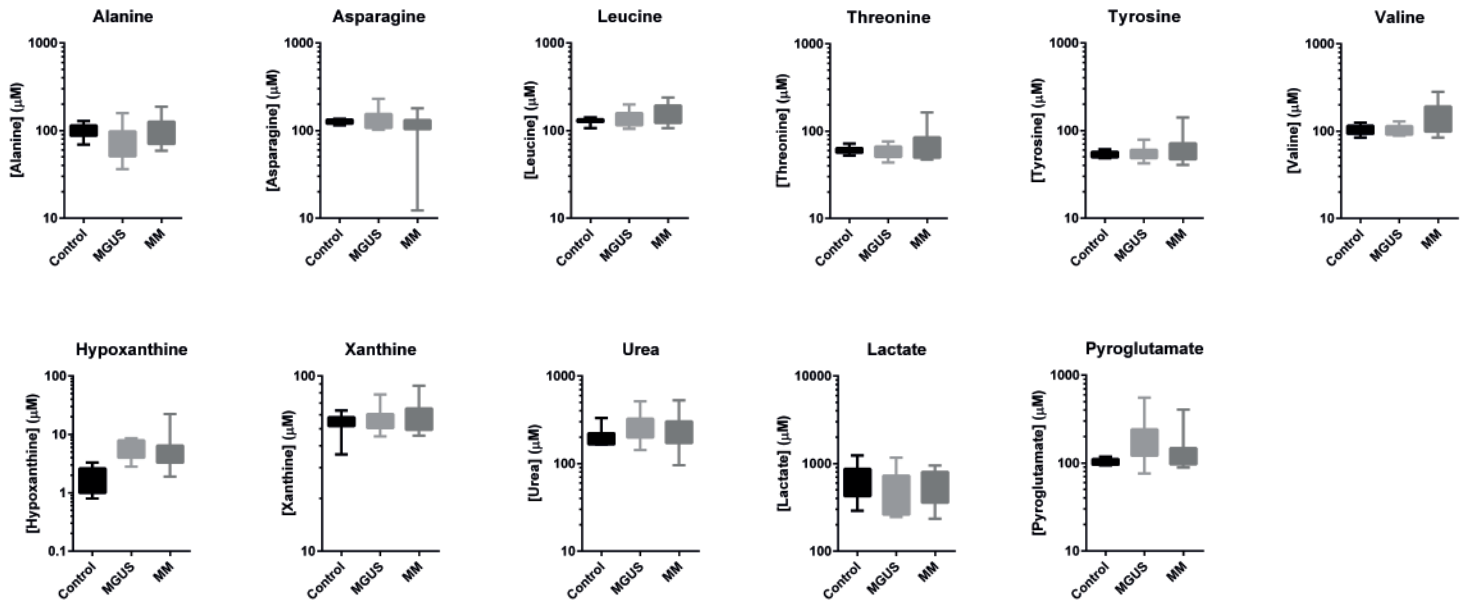

Supplementary Figure 1
